# Supplementary material for: Clinical Impact of High Throughput Sequencing on Liquid Biopsy in Advanced Solid Cancer
Source: MDPI journal article supplement (doi:10.3390/curroncol29030155), 2022-03-10
Supplement: s1 [file s1]

# Clinical Impact of High Throughput Sequencing on Liquid Biopsy in Advanced Solid Cancer

## SUPPLEMENTARY MATERIALS

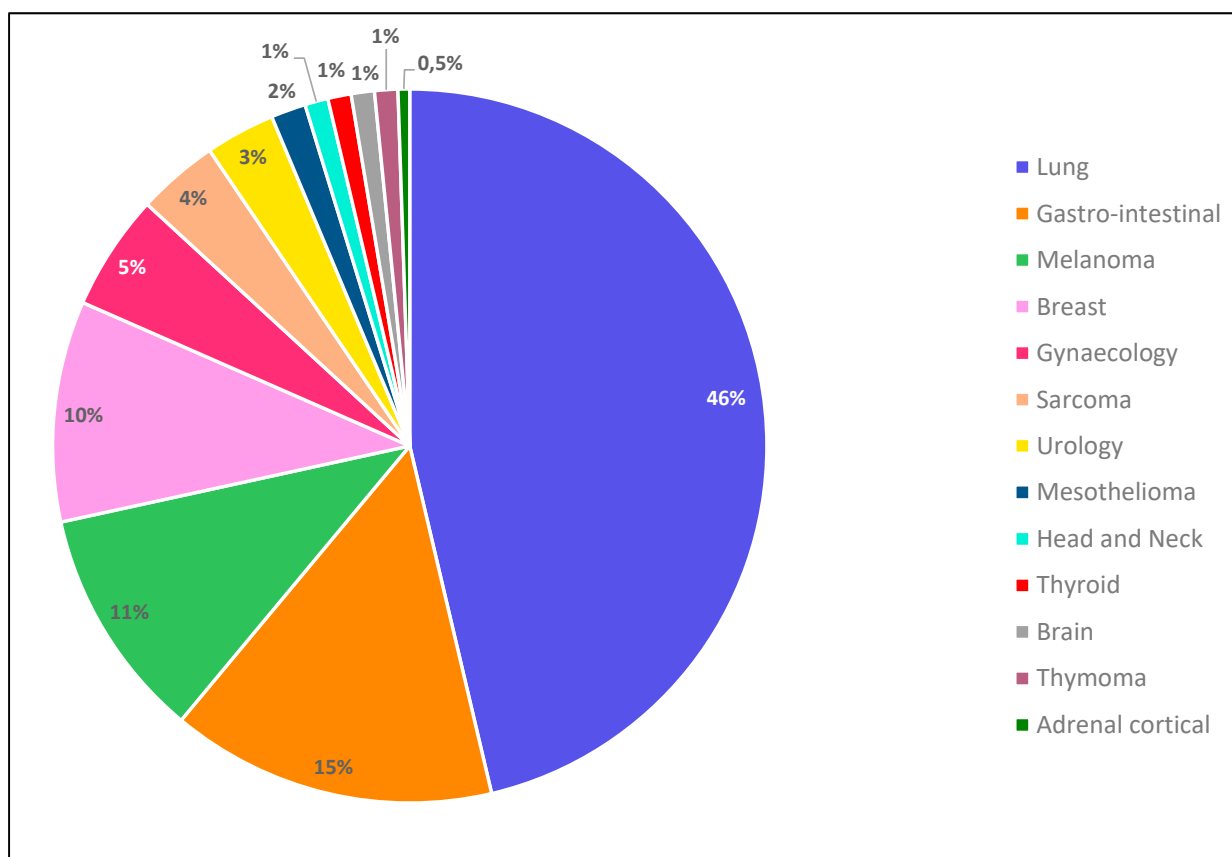

**Figure S1:** Proportions of tumor types.

Gastro-intestinal tumors include: pancreas (6%), colorectal (4%), stomach (3%), oesophagus (1%), and cholangiocarcinoma (1%). Gynaecological tumors include: endometrial (3%), ovarian (2%), and cervix (0.5%). Urological tumors include: prostate (2%), kidney (1%), and urinary tractus (0.5%).

**Table S1:** Targeted molecular alterations and molecularly matched therapy used.

| Altered gene | N (%)<br>(n = 37) | Specific alteration           | VAF (%)  | Cancer type     | Targeted therapy used               |
|--------------|-------------------|-------------------------------|----------|-----------------|-------------------------------------|
| EGFR         | 5 (14%)           | T790M                         | 18.9%    | Lung            | osimertinib                         |
|              |                   | T790M                         | 0.17%    | Lung            | osimertinib                         |
|              |                   | Deletion exon 19              | 20.2%    | Lung            | osimertinib                         |
|              |                   | Splice site 2947-2A>C         | 6.8%     | Lung            | afatinib                            |
|              |                   | Amplification                 | Detected | Lung            | osimertinib                         |
| ATM          | 3 (8%)            | R3008C                        | 0.15%    | Lung            | olaparib                            |
|              |                   | R3008H                        | -        | Colorectal      | olaparib + ceralasertib             |
|              |                   | Deletion exons 39-46          | 22%      | Melanoma        | olaparib + dabrafenib + trametinib  |
| BRAF         | 3 (8%)            | K601N                         | 5.7%     | Lung            | dabrafenib + trametinib             |
|              |                   | G466R                         | 2.1%     | Urinary tractus | dabrafenib + trametinib             |
|              |                   | V600E                         | 9.3%     | Melanoma        | dabrafenib + trametinib             |
| MET          | 3 (8%)            | Amplification                 | Detected | Lung            | crizotinib                          |
|              |                   | Amplification                 | Detected | Lung            | crizotinib                          |
|              |                   | Splice site exon 14           | 0.38%    | Lung            | capmatinib                          |
|              |                   | (3028+3_3028+12delATATTTCAGT) |          |                 |                                     |
| PTEN         | 3 (8%)            | G127*                         | 30.7%    | Melanoma        | everolimus                          |
|              |                   | PTEN loss                     | Detected | Breast          | everolimus + exemestane             |
|              |                   | K183fs*16                     | 11.2%    | Breast          | everolimus                          |
| PIK3CA       | 3 (8%)            | E545K                         | 1.1%     | Lung            | everolimus                          |
|              |                   | E542K                         | 15.7%    | Breast          | olaparib + fulvestrant + gosereline |
|              |                   | E545K                         | 1.5%     | Breast          | everolimus + exemestane             |
| CHEK2        | 2 (5%)            | L96*                          | -        | Lung            | olaparib + ceralasertib             |
|              |                   | R523fs*43                     | 0.24%    | Stomach         | rucaparib + atezolizumab            |
| TMB          | 2 (5%)            | 19 mut/Mb                     | -        | Pancreas        | pembrolizumab                       |
|              |                   | 95 mut/Mb                     | -        | Stomach         | nivolumab                           |
| PALB2        | 1 (2%)            | S779                          | 49.7%    | Lung            | olaparib                            |
| BRCA2        | 1 (2%)            | R1738fs*2                     | 50.9%    | Prostate        | olaparib                            |
| GNAQ         | 1 (2%)            | Q209L                         | 4.7%     | Melanoma        | trametinib                          |

|                 |        |                        |          |          |                         |
|-----------------|--------|------------------------|----------|----------|-------------------------|
| <i>GNA11</i>    | 1 (2%) | <i>Q209L</i>           | 0.52%    | Melanoma | trametinib              |
| <i>HRAS</i>     | 1 (2%) | <i>Q61R</i>            | 22.3%    | Lung     | tipifarnib              |
| <i>CDKN2A/B</i> | 1 (2%) | <i>p16INK4a W15*</i>   | 6.8%     | Melanoma | abemaciclib             |
| <i>MTOR</i>     | 1 (2%) | <i>T1977R</i>          | 11.9%    | Lung     | everolimus              |
| <i>RET</i>      | 1 (2%) | <i>V804M</i>           | 48.8%    | Lung     | selpercatinib           |
| <i>ERBB2</i>    | 1 (2%) | Amplification          | Detected | Breast   | trastuzumab-emtansine   |
| <i>ESR1</i>     | 1 (2%) | <i>Y537N</i>           | -        | Breast   | fulvestrant             |
| <i>TSC1</i>     | 1 (2%) | <i>Q280*</i>           | 8.8%     | Breast   | everolimus + exemestane |
|                 |        | <i>L627fs*22</i>       | 1.2%     |          |                         |
| <i>ROS1-FGD</i> | 1 (2%) | Fusion (non-canonical) | 4.1%     | Lung     | lorlatinib              |
| <i>EML4-ALK</i> | 1 (2%) | Fusion (variant 1)     | 1.1%     | Lung     | Alectinib               |

TMB: Tumor mutational burden; VAF: Variant allelic frequency

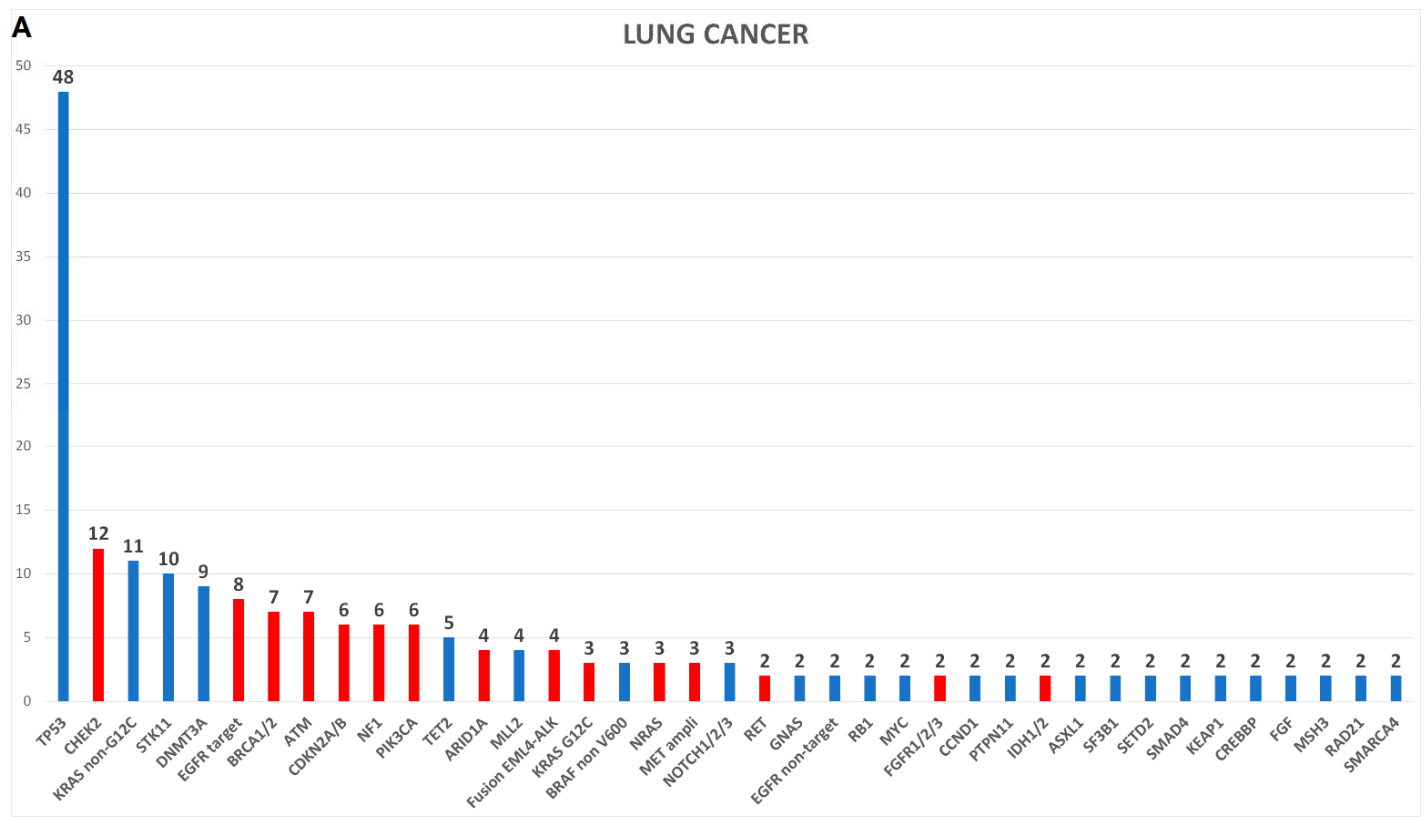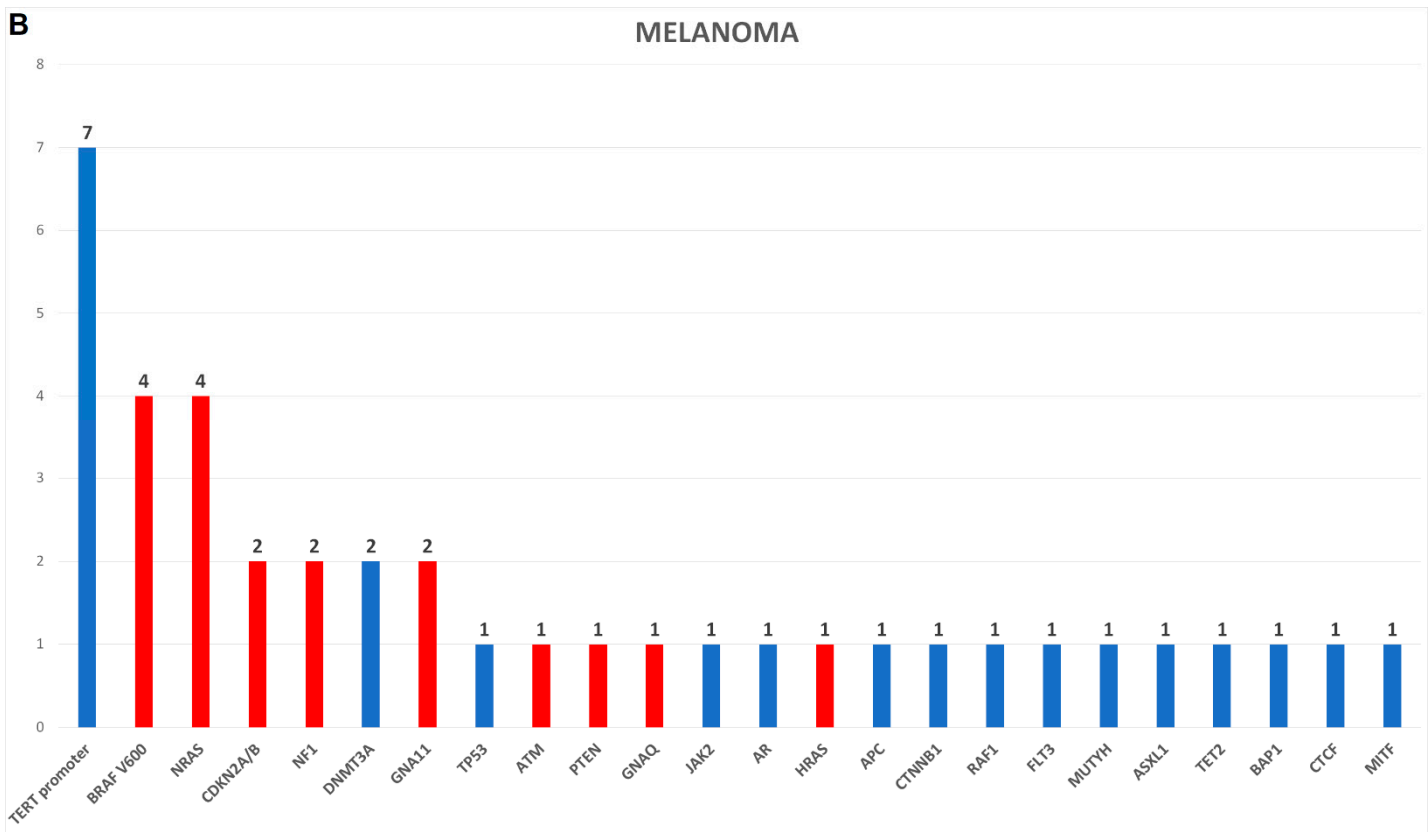

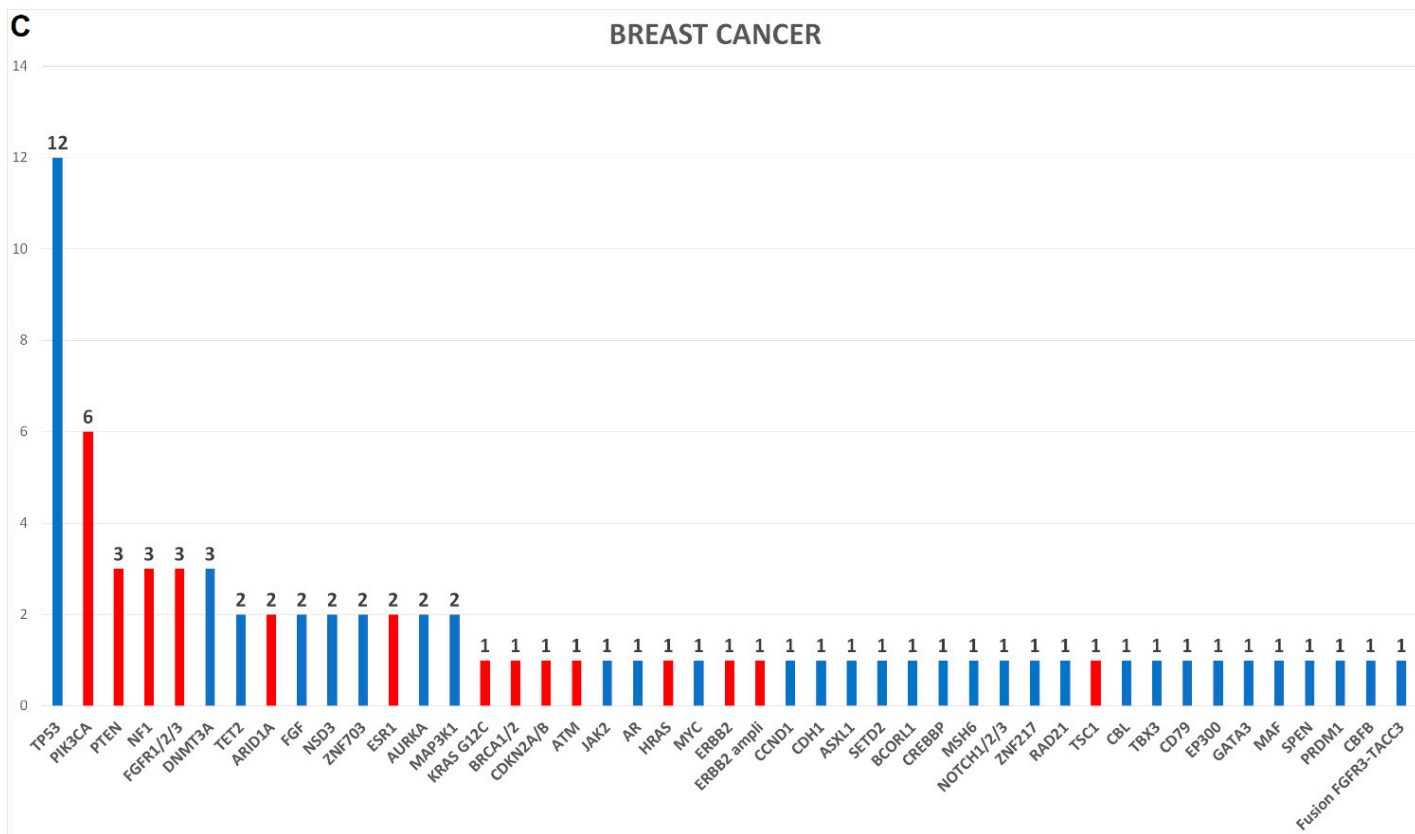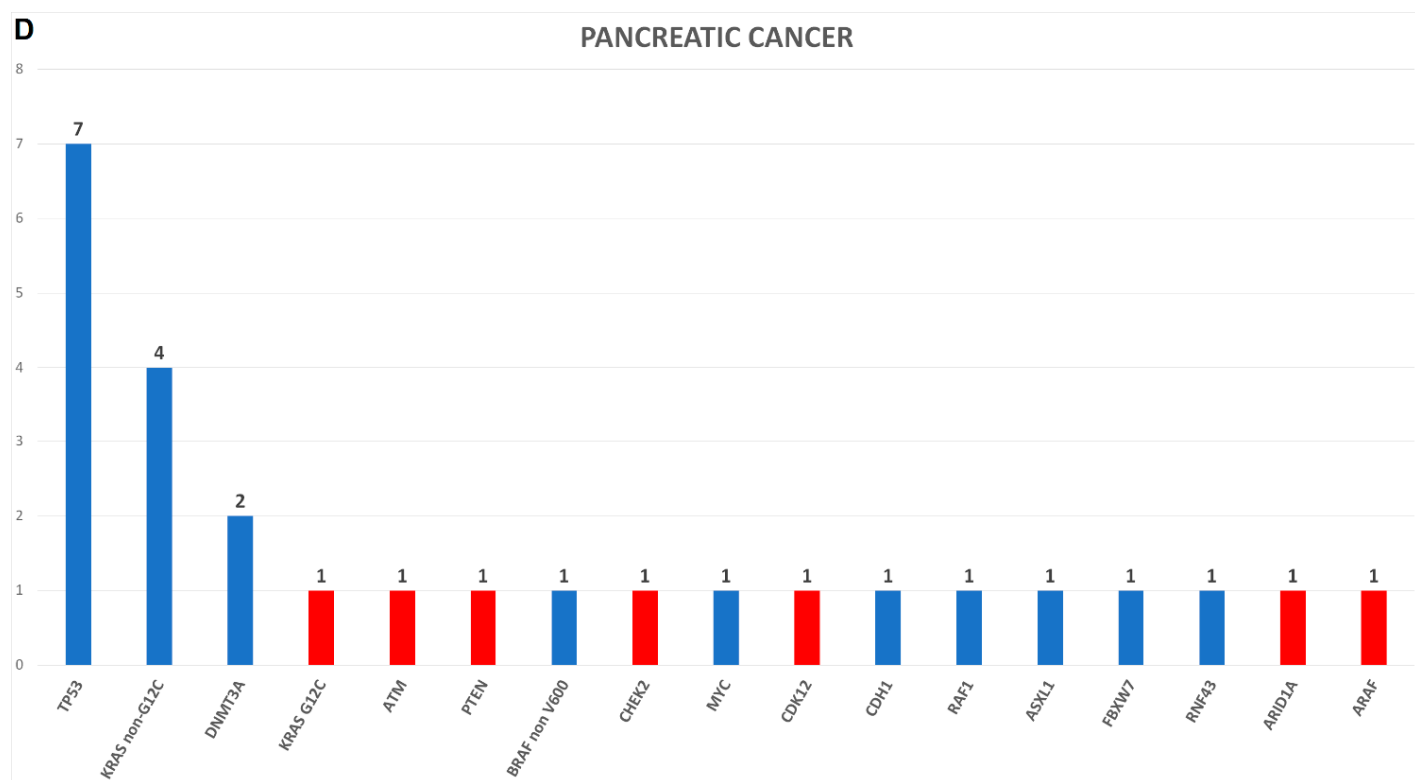

**Figure S2:** Molecular alterations according to the 4 most common tumor types: (A) Lung cancer (39 most frequent), (B) Breast cancer, (C) Melanoma, and (D) Pancreatic cancer.

Actionable molecular alterations are colored in red. Non-actionable molecular alterations are colored in blue.

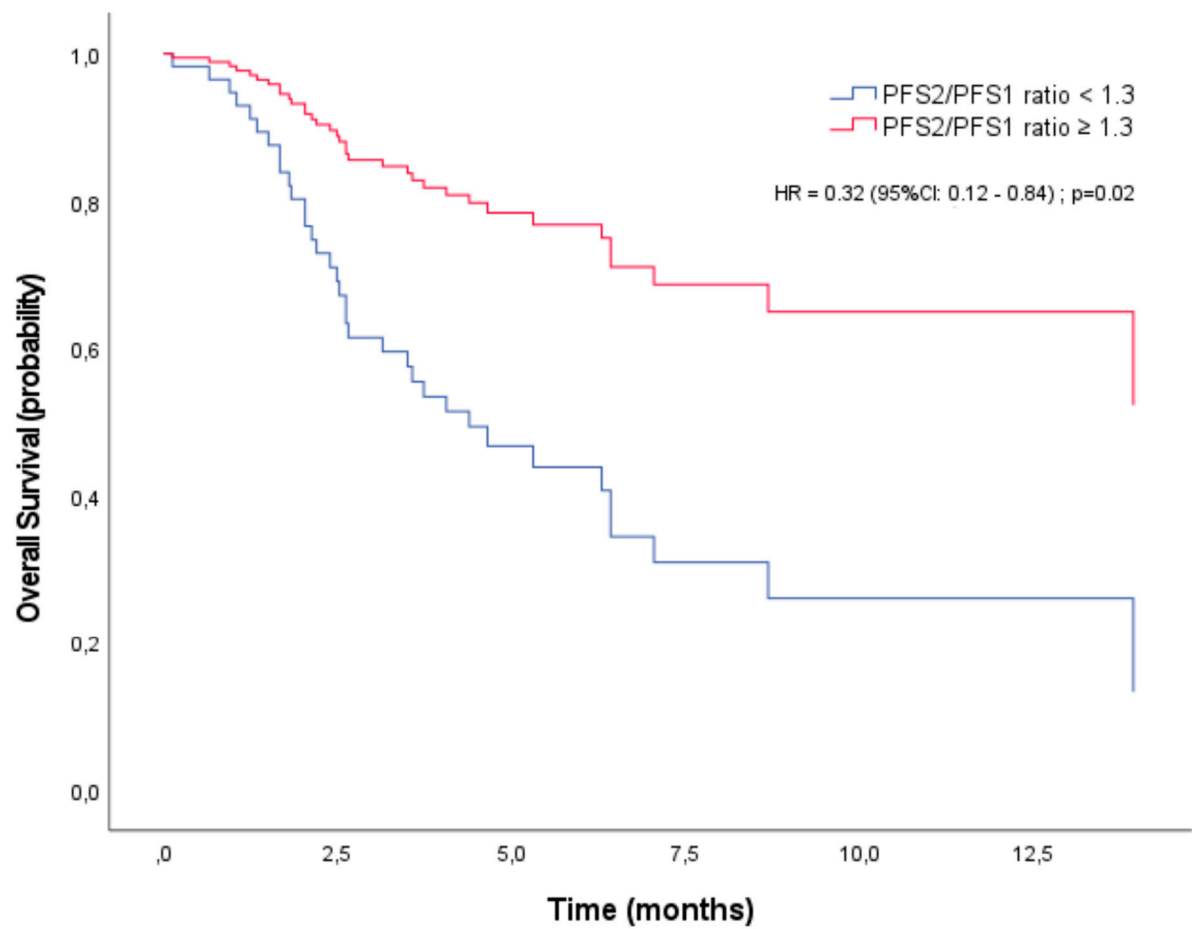

**Figure S4:** Kaplan-Meier curves of overall survival (OS) according to PFS2/PFS1 ratio.

**Table S2:** Efficacy parameters in the cohort of patients with level 1-2 AMA (according to OncoKB database [34]) (*n*=50).

| Efficacy            | Level 1-2 AMA +<br>MMT<br><i>n</i> =23 | Level 1-2 AMA +<br>non-MMT<br><i>n</i> =27 | <i>p</i> -Value* |
|---------------------|----------------------------------------|--------------------------------------------|------------------|
| PFS2/PFS1           |                                        |                                            |                  |
| Median (range)      | 0.63 (0 – 11.9)                        | 0.81 (0 – 7.2)                             | -                |
| Ratio ≥ 1.3 (%)     | 4/21 (19%)                             | 7/26 (27%)                                 | 0.73             |
| Missing             | 2                                      | 1                                          | -                |
| PFS2                |                                        |                                            | 0.87             |
| Median (95%CI)      | 2.7 (0.7 – 4.7)                        | 2.8 (2.3 – 3.2)                            |                  |
| OS                  |                                        |                                            | 0.60             |
| Median (95%CI)      | 4.7 (1.4 – 7.9)                        | 7.2 (0.0 – 14.5)                           |                  |
| Tumor response      |                                        |                                            |                  |
| Complete response   | 1 (4%)                                 | 0                                          | -                |
| Partial response    | 4 (17%)                                | 3 (11%)                                    | -                |
| Stable disease      | 4 (17%)                                | 7 (26%)                                    | -                |
| Progressive disease | 9 (39%)                                | 11 (41%)                                   | -                |
| ORR                 | 5 (22%)                                | 3 (11%)                                    | 0.43             |
| Disease control     | 9 (39%)                                | 10 (37%)                                   | 1.00             |
| Not available       | 5 (22%)                                | 6 (22%)                                    | -                |

AMA: actionable molecular alteration; MMT: molecularly matched therapy; ORR: overall response rate; OS: overall survival; PFS: progression-free survival

\* *p*-Value is provided for comparison between groups: “Level 1-2 AMA + MMT” vs “Level 1-2 AMA + non-MMT”
